# Supplementary material for: Studies of PET nonwovens modified by novel antimicrobials configured with bothN-halamine and dual quaternary ammonium with different alkyl chain length
Source: Royal Society of Chemistry journal article supplement (doi:10.1039/c9ra00094a), 2019-01-01
Supplement: c9ra00094a1.pdf [file c9ra00094a1.pdf]

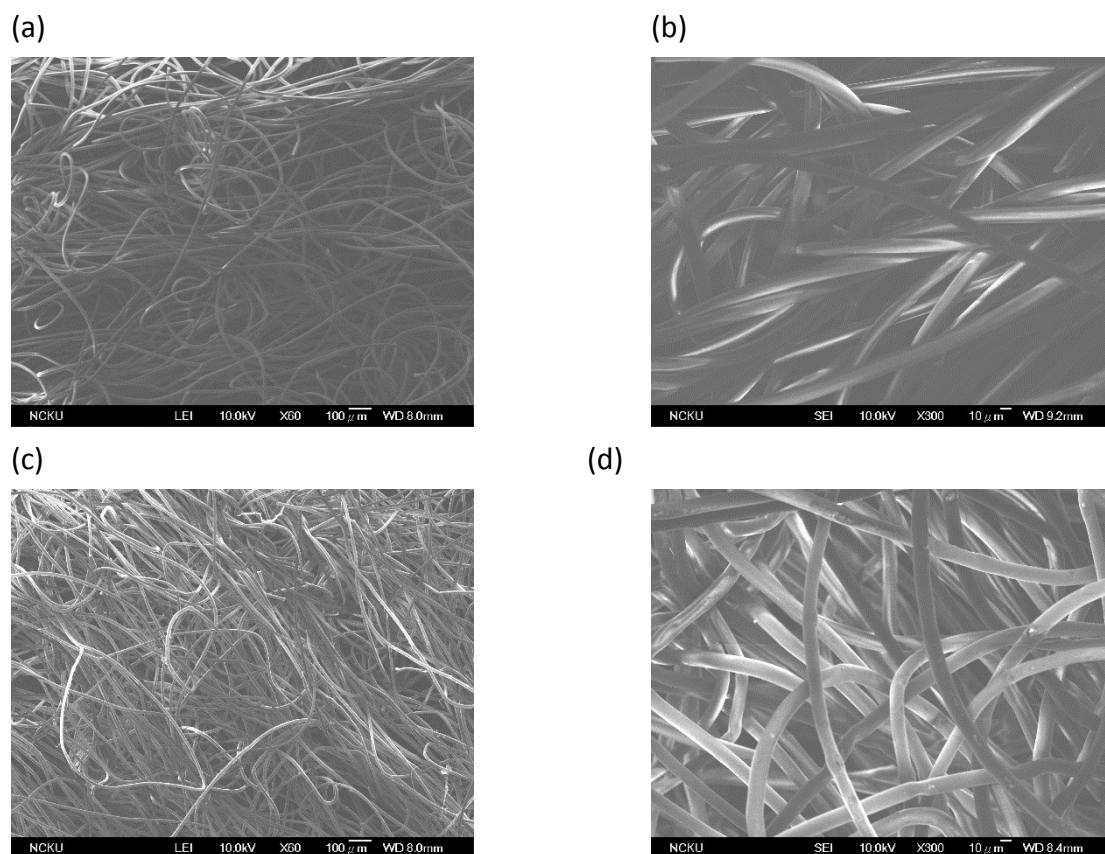

Supplementary Figure 1. The SEM micrographs for (a, b) non-treated PET nonwovens and (c, d) PETsDQAC0 (X60 for a and c; X300 for b and d).
